# Supplementary material for: cDNA Isolation and Functional Characterization of UDP-d-glucuronic Acid 4-Epimerase Family from Ornithogalum caudatum
Source: PubMed Central journal article supplement (PMC6273887; doi:10.3390/molecules21111505), 2016-11-09
Supplement: molecules-21-01505-s001.pdf [file molecules-21-01505-s001.pdf]

# Supplementary Materials: cDNA Isolation and Functional Characterization of UDP-D-glucuronic Acid 4-Epimerase Family from *Ornithogalum caudatum*

Sen Yin, Yu-Jia Sun, Ming Liu, Li-Na Li and Jian-Qiang Kong

Table S1. Strains and plasmids used in this study.

| Strain/Plasmid                    | Description                                                                                                                                                                                                                                                              | Source                           |
|-----------------------------------|--------------------------------------------------------------------------------------------------------------------------------------------------------------------------------------------------------------------------------------------------------------------------|----------------------------------|
| <b>Strain</b>                     |                                                                                                                                                                                                                                                                          |                                  |
| <i>Trans1-T1</i>                  | <i>Escherichia coli</i> ,<br>F-φ80( <i>lacZ</i> )ΔM15Δ <i>lacX74</i> <i>hsdR</i> ( <i>r<sub>k</sub></i> , <i>m<sub>k</sub></i> +) <i>ΔrecA13</i><br><i>98endA1tonA</i>                                                                                                   | TransGen, Beijing,<br>China      |
| <i>Transetta</i> (DE3)            | <i>E. coli</i> , F-omp <i>T</i> <i>hsdS<sub>B</sub></i> ( <i>r<sub>B</sub></i> <i>m<sub>B</sub></i> ) <i>gal dcm</i><br><i>lacY1</i> (DE3) <i>pRARE</i> ( <i>argU</i> ,<br><i>argW</i> , <i>ilex</i> , <i>glyT</i> , <i>leuW</i> , <i>proL</i> )) <i>Cam<sup>r</sup></i> | TransGen, Beijing,<br>China      |
| GS115                             | <i>Pichia pastoris</i> , His <sup>+</sup> , Mut <sup>+</sup>                                                                                                                                                                                                             | Invitrogen, Carlsbad,<br>CA, USA |
| <b>Plasmid</b>                    |                                                                                                                                                                                                                                                                          |                                  |
| <i>pEASY</i> <sup>TM</sup> -Blunt | General cloning vector, T7 promoter, f1 ori,<br>Amp <sup>r</sup> and Kan <sup>r</sup>                                                                                                                                                                                    | TransGen, Beijing,<br>China      |
| pET-28a(+)                        | General expression vector, T7 promoter, f1 ori,<br>Kan <sup>r</sup>                                                                                                                                                                                                      | Novagen, Madison,<br>USA         |
| pPIC3.5K                          | <i>Pichia pastoris</i> expression vector, AOX1<br>promoter                                                                                                                                                                                                               | Invitrogen, Carlsbad,<br>CA, USA |
| pGro7                             | Chaperone plasmid, <i>araB</i> promoter, Cm <sup>r</sup>                                                                                                                                                                                                                 |                                  |
| pEASY-OcUGlcAE1                   | <i>pEASY</i> <sup>TM</sup> -Blunt derived plasmid containing<br><i>OcUGlcAE1</i> gene                                                                                                                                                                                    | This study                       |
| pEASY-OcUGlcAE2                   | <i>pEASY</i> <sup>TM</sup> -Blunt derived plasmid containing<br><i>OcUGlcAE2</i> gene                                                                                                                                                                                    | This study                       |
| pEASY-OcUGlcAE3                   | <i>pEASY</i> <sup>TM</sup> -Blunt derived plasmid containing<br><i>OcUGlcAE3</i> gene                                                                                                                                                                                    | This study                       |
| pET28aOcUGlcAE1(Δ1-116)           | pET-28a(+) derived plasmid containing<br>trun- <i>OcUGlcAE1</i> gene                                                                                                                                                                                                     | This study                       |
| pET28aOcUGlcAE2(Δ1-136)           | pET-28a(+) derived plasmid containing<br>trun- <i>OcUGlcAE2</i> gene                                                                                                                                                                                                     | This study                       |
| pET28aOcUGlcAE3(Δ1-128)           | pET-28a(+) derived plasmid containing<br>trun- <i>OcUGlcAE3</i> gene                                                                                                                                                                                                     | This study                       |
| pPIC3.5KOcUGlcAE1                 | pPIC3.5K derived plasmid containing<br><i>OcUGlcAE1</i> gene                                                                                                                                                                                                             | This study                       |
| pPIC3.5KOcUGlcAE2                 | pPIC3.5K derived plasmid containing<br><i>OcUGlcAE2</i> gene                                                                                                                                                                                                             | This study                       |
| pPIC3.5KOcUGlcAE3                 | pPIC3.5K derived plasmid containing<br><i>OcUGlcAE3</i> gene                                                                                                                                                                                                             | This study                       |

**Table S2.** The putative TM helix of OcUGlcAE3 and other UGlcAEs from varied organisms.

| UGlcAE    | Possible TM Helix (aa-aa) |
|-----------|---------------------------|
| AtUGlcAE1 | 31~50                     |
| AtUGlcAE2 | 37~59                     |
| AtUGlcAE3 | 34~56, 85~107             |
| ZmUGlcAE3 | 31~53                     |
| OsUGlcAE1 | 49~66, 116~138            |
| OsUGlcAE2 | NO                        |
| OsUGlcAE3 | 31~53                     |
| OcUGlcAE3 | 36~58, 110~132            |

**Table S3.** Primers used in this research.

| Primers     | Sequences(5'-3')                                   | Description                                                                |
|-------------|----------------------------------------------------|----------------------------------------------------------------------------|
| FGlcAE1-1   | AGAGGGAAAAAGAAAGATGAAG                             | Forward primer used for <i>OcUGlcAE1</i> amplification in the first round  |
| RGlcAE1-1   | CTCCTACCAATAACAAAAATCG                             | Reverse primer used for <i>OcUGlcAE1</i> amplification in the first round  |
| FGlcAE1-2   | ATGAGGATACTGGAGGAGGAGC                             | Forward primer used for <i>OcUGlcAE1</i> amplification in the second round |
| RGlcAE1-2   | TTACAAATTCAAGCCCCCTCTC                             | Reverse primer used for <i>OcUGlcAE1</i> amplification in the second round |
| FGlcAE2-1   | CTTGCAATCAATCATCAAAGAT                             | Forward primer used for <i>OcUGlcAE2</i> amplification in the first round  |
| RGlcAE2-1   | TTCGGGCGGCAGCAGAGC                                 | Reverse primer used for <i>OcUGlcAE2</i> amplification in the first round  |
| FGlcAE2-2   | ATGCCGGCTCCATCGTCGTC                               | Forward primer used for <i>OcUGlcAE2</i> amplification in the second round |
| RGlcAE2-2   | CTACTCTTTGTGCCCTCCTC                               | Reverse primer used for <i>OcUGlcAE2</i> amplification in the second round |
| FGlcAE3-1   | CTCTATCTTTCTCTCTCTCT                               | Forward primer used for <i>OcUGlcAE3</i> amplification in the first round  |
| RGlcAE3-1   | GCAGCTCCCCCGTCTCTCC                                | Reverse primer used for <i>OcUGlcAE3</i> amplification in the first round  |
| FGlcAE3-2   | ATGGACGCGATGATCTCGCC                               | Forward primer used for <i>OcUGlcAE3</i> amplification in the second round |
| RGlcAE3-2   | TCAGCTCGAGTTACTCCTCG                               | Reverse primer used for <i>OcUGlcAE3</i> amplification in the second round |
| F28aGlcAE1  | GGTCGCGGATCCGAATTCATGGCCCTC<br>AAGAAGCGCGGCGA      | Forward primer used for pET28aOcUGlcAE1 ( $\Delta 1-116$ ) construction    |
| R28aGlcAE1  | GAGTGCGGCCGCAAGCTTCAAATTCTT<br>GCCCCCTCTCG         | Reverse primer used for pET28aOcUGlcAE1 ( $\Delta 1-116$ ) construction    |
| F28aGlcAE2  | GGTCGCGGATCCGAATTCATGAAGAAG<br>CGAGGGGACGGTGT      | Forward primer used for pET28aOcUGlcAE2 ( $\Delta 1-136$ ) construction    |
| R28aGlcAE2  | GAGTGCGGCCGCAAGCTTCTTTTGTGC<br>CCTCCTCCTC          | Reverse primer used for pET28aOcUGlcAE2 ( $\Delta 1-136$ ) construction    |
| F28aGlcAE3  | GGTCGCGGATCCGAATTCATGTCCGCC<br>GCCCTCAAGCGACG      | Forward primer used for pET28aOcUGlcAE3 ( $\Delta 1-128$ ) construction    |
| R28aGlcAE3  | GAGTGCGGCCGCAAGCTTGCTCGAGTT<br>ACTCCTCGCAC         | Reverse primer used for pET28aOcUGlcAE3 ( $\Delta 1-128$ ) construction    |
| F3.5kGlcAE1 | ACTAATTATTCGAAGGATCCGCCACCA<br>TGAGGATACTGGAGGAGGA | Forward primer used for pPIC3.5KOcUGlcAE1 construction                     |
| R3.5kGlcAE1 | GCGCGGCCGCCCTAGGGAATTCCTTACA<br>AATTCCTTGCCCCCTC   | Reverse primer used for pPIC3.5KOcUGlcAE1 construction                     |
| F3.5kGlcAE2 | ACTAATTATTCGAAGGATCCGCCACCA<br>TGCCGGCTCCATCGTCGTC | Forward primer used for pPIC3.5KOcUGlcAE2 construction                     |
| R3.5kGlcAE2 | GCGCGGCCGCCCTAGGGAATTCCTACT<br>CTTTGTGCCCTCCTC     | Reverse primer used for pPIC3.5KOcUGlcAE2 construction                     |

|             |                                                    |                                                                         |
|-------------|----------------------------------------------------|-------------------------------------------------------------------------|
| F3.5kGlcAE3 | ACTAATTATTCGAAGGATCCGCCACCA<br>TGGACGCGATGATCTCGCC | Forward primer used for pPIC3.5KOcUGlcAE3 construction                  |
| R3.5kGlcAE3 | GCGCGGCCGCCCTAGGGAATTCTCAGC<br>TCGAGTTACTCTCG      | Reverse primer used for pPIC3.5KOcUGlcAE3 construction                  |
| 5' AOX1     | GACTGGTTCCAATTGACAAGC                              | Forward primer used for PCR identification of pPIC3.5k derived plasmids |
| 3' AOX1     | GCAAATGGCATTCTGACATCC                              | Reverse primer used for PCR identification of pPIC3.5k derived plasmids |
| FOcUGlcAE1  | CTCAACCTGGCAACACCT                                 | Forward primer used for RT-qPCR analysis of <i>OcUGlcAE1</i>            |
| ROcUGlcAE1  | GGTCCTGGCGTAACTGATGT                               | Reverse primer used for RT-qPCR analysis of <i>OcUGlcAE1</i>            |
| FOcUGlcAE2  | TCCTCTCCTCCTCCTCCTC                                | Forward primer used for RT-qPCR analysis of <i>OcUGlcAE2</i>            |
| ROcUGlcAE2  | GCCTGTCCCTTTCAGTGAG                                | Reverse primer used for RT-qPCR analysis of <i>OcUGlcAE2</i>            |
| FOcUGlcAE3  | ACATTGCTGGCCTTGTACC                                | Forward primer used for RT-qPCR analysis of <i>OcUGlcAE3</i>            |
| ROcUGlcAE3  | CCGTACACCGTGAAGAACCT                               | Reverse primer used for RT-qPCR analysis of <i>OcUGlcAE3</i>            |
| FGAPDH2     | ACTGGTGTCCACCGACTTC                                | Forward primer used for RT-qPCR analysis of <i>GAPDH1</i>               |
| RGAPDH2     | ATTCGTTGTCGTACCAAGCC                               | Reverse primer used for RT-qPCR analysis of <i>GAPDH1</i>               |

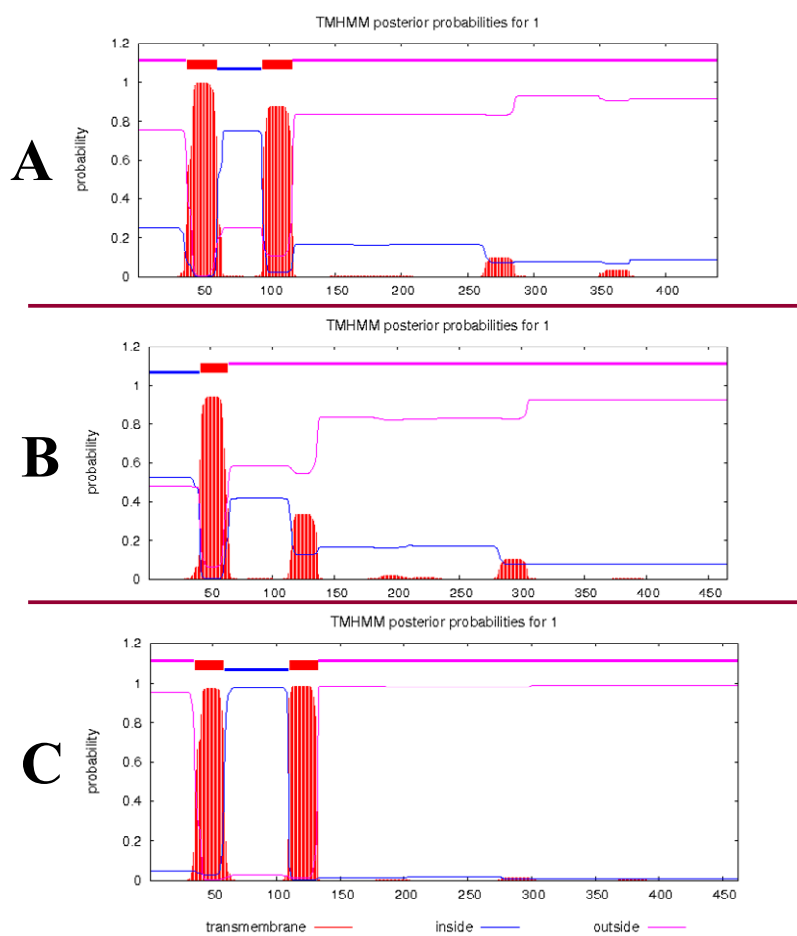

**Figure S1.** The predicted transmembrane helices of OcUGlcAE1 (A); OcUGlcAE2 (B) and OcUGlcAE3 (C).

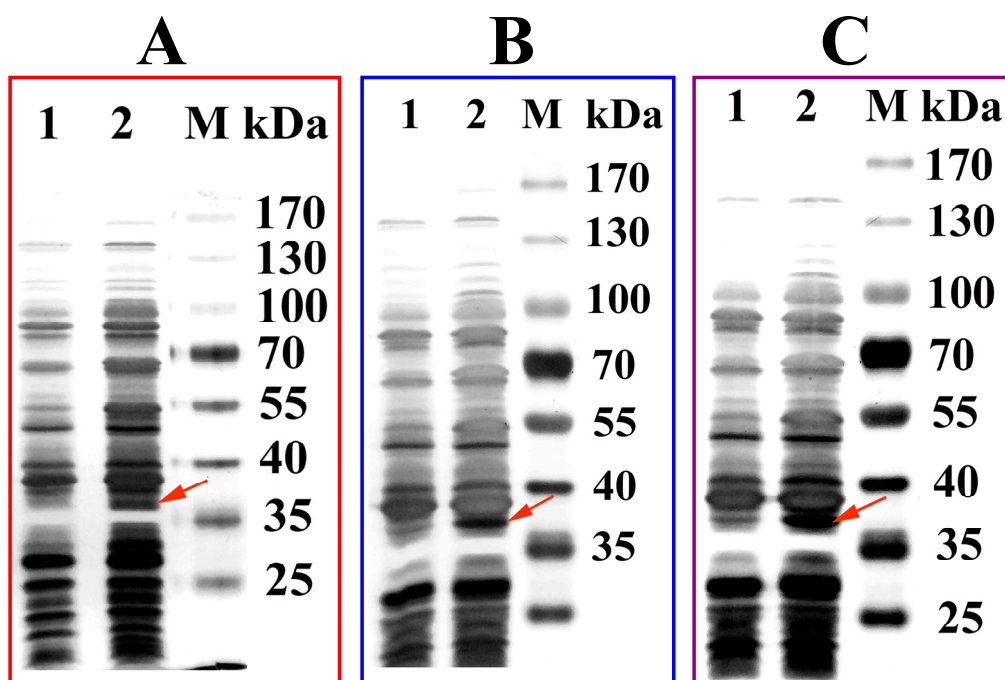

**Figure S2.** SDS-PAGE analyses of total soluble proteins isolated from *E. coli* cells expressing OcUGlcAE1 ( $\Delta 1-116$ ) (A); OcUGlcAE2 ( $\Delta 1-136$ ) (B) or OcUGlcAE3 ( $\Delta 1-128$ ) (C). Lanes 1 and 2 referred to the total extract of cells harboring the empty vector and the recombinant vector, respectively. The arrows indicated the overproduced proteins

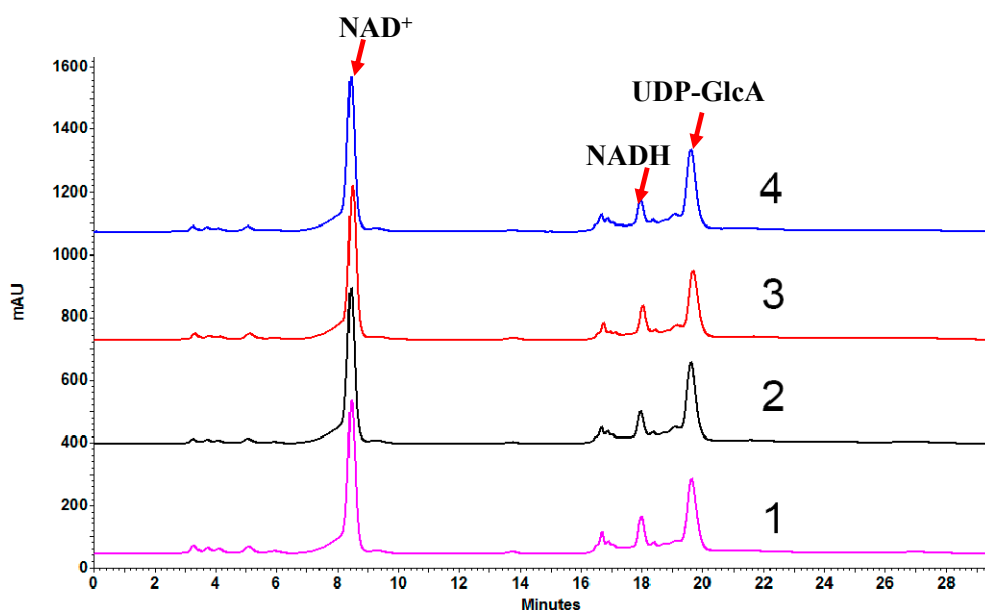

**Figure S3.** HPLC profiles of reaction mixtures generated by *E. coli* expressing the empty vector alone (1), pET28aOcUGlcAE1 ( $\Delta 1-116$ ) (2), pET28aOcUGlcAE2 ( $\Delta 1-136$ ) (3) or pET28aOcUGlcAE3 ( $\Delta 1-128$ ) (4) in the presence of UDP-GlcA and NAD<sup>+</sup>.

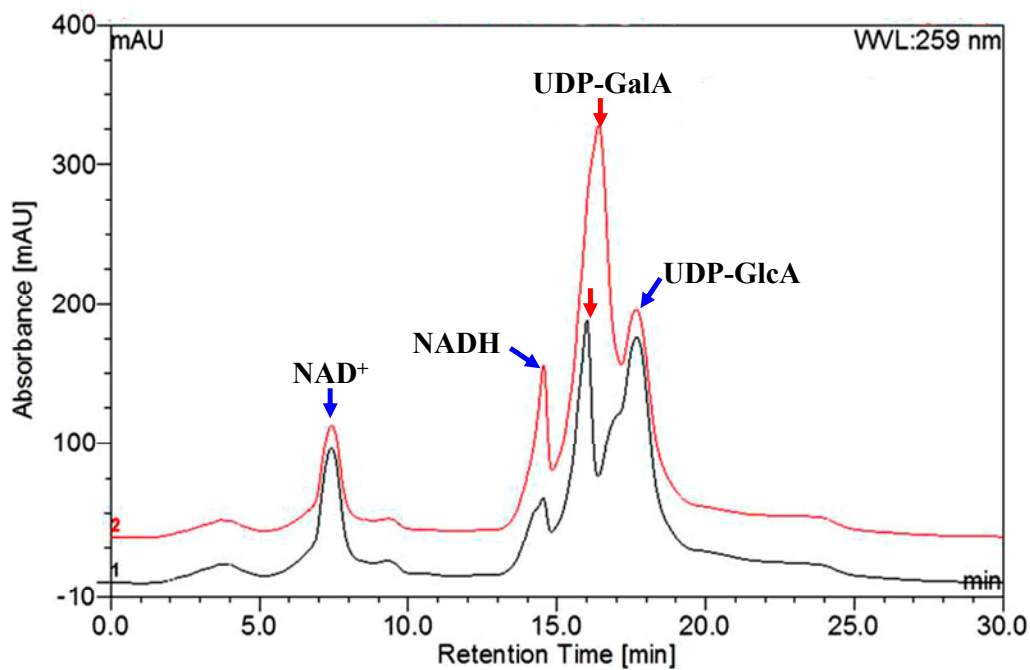

**Figure S4.** HPLC profiles of OcUGlAE3-catalyzed reaction mixtures co-injected with (2) or without UDP-GalA (1). The red arrows stand for UDP-GalA.

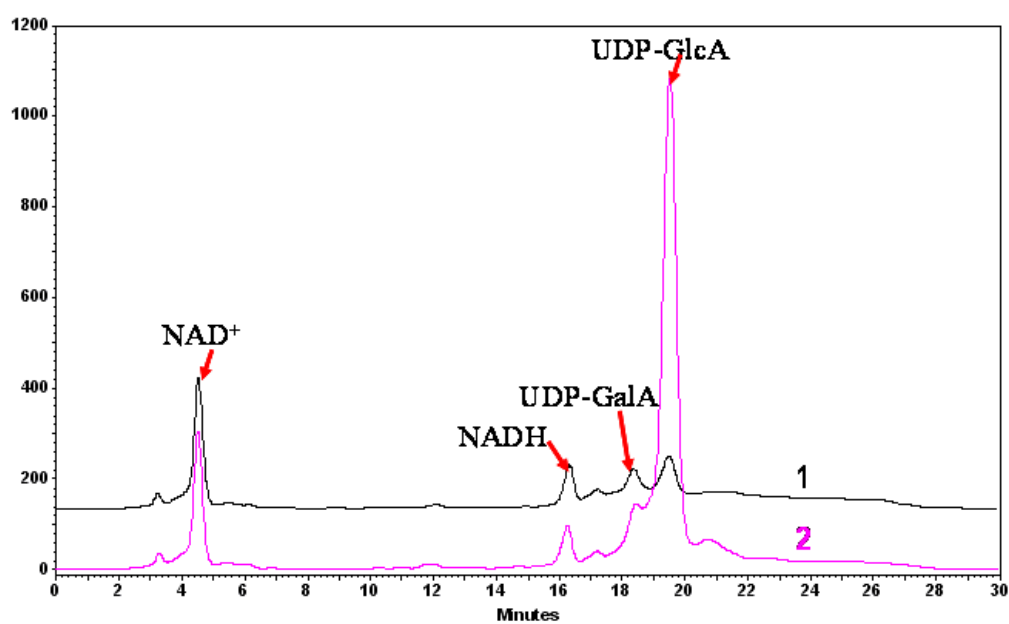

**Figure S5.** HPLC profiles of OcUGlAE3-catalyzed reaction mixtures co-injected with (1) or without UDP-GlcA (2).

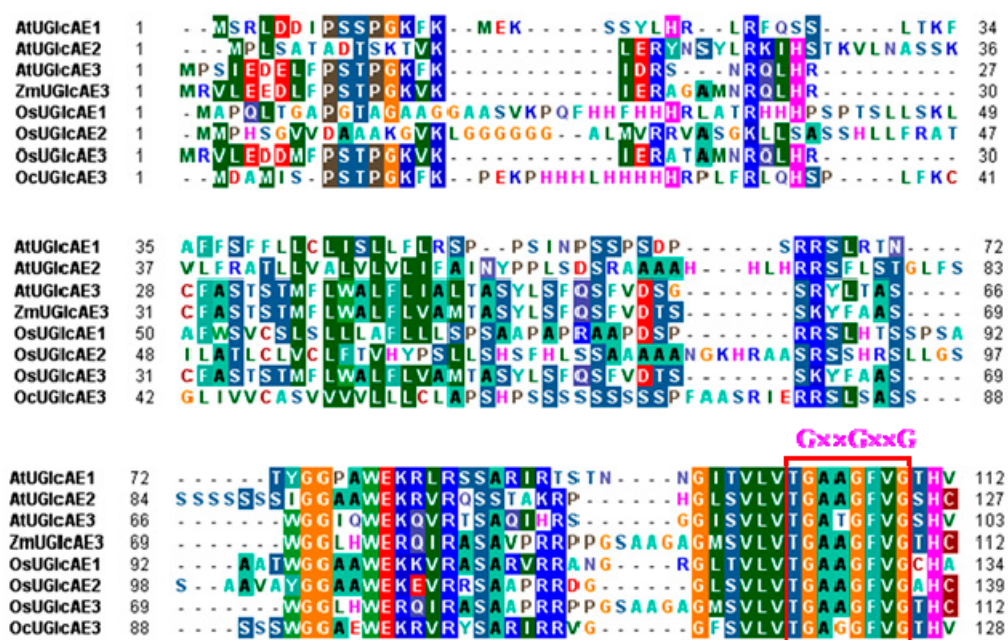

**Figure S6.** N-terminal alignment of OcUGlcAE3 and other UGlcAEs from varied organisms. The red box represents the GxxGxxG motif.
